# Supplementary material for: 1H NMR Metabolic Profile of Scyphomedusa Rhizostoma pulmo (Scyphozoa, Cnidaria) in Female Gonads and Somatic Tissues: Preliminary Results
Source: PubMed Central journal article supplement (PMC7070884; doi:10.3390/molecules25040806), 2020-02-13
Supplement: molecules-25-00806-s001.pdf [file molecules-25-00806-s001.pdf]

## Supplementary Information

# $^1\text{H}$ NMR Metabolic profile of scyphomedusa *Rhizostoma pulmo* (Scyphozoa, Cnidaria) in female gonads and somatic tissues: preliminary results

Angilè, F.<sup>1</sup>, Del Coco L.<sup>1</sup>, Girelli, C.R.<sup>1</sup>, Basso, L.<sup>1,2</sup>, Rizzo, L.<sup>2,3</sup>, Piraino, S.<sup>1,2</sup>, Stabili, L.<sup>1,4</sup>, Fanizzi, F.P.<sup>1\*</sup>

<sup>1</sup> Department of Biological and Environmental Sciences and Technologies (Di.S.Te.B.A.), University of Salento, via Monteroni, 73100- Lecce (Italy); federica.angile@unisalento.it; laura.delcoco@unisalento.it; chiara.girelli@unisalento.it; fp.fanizzi@unisalento.it

<sup>2</sup> CoNISMa, Piazzale Flaminio, 9, Roma (Italy); lorena.basso@unisalento.it; stefano.piraino@unisalento.it

<sup>3</sup> Integrative Marine Ecology, Stazione Zoologica Anton Dohrn, Villa Comunale, 80121 Napoli, (Italy); lucia.rizzo@szn.it

<sup>4</sup> Water Research Institute of the National Research Council, (IRSA-CNR), Via Roma 3, Taranto, (Italy); loredana.stabili@irsa.cnr.it

\* Correspondence: fp.fanizzi@unisalento.it; tel.: +39-0832-299265

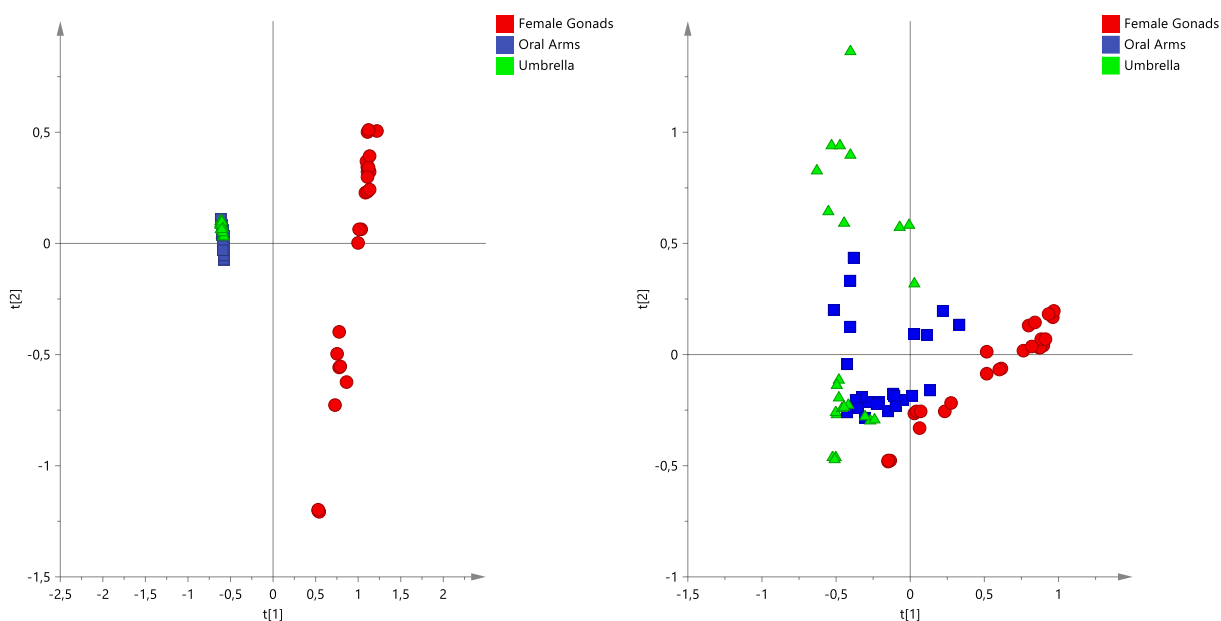

**Figure S1.** a) t[1]/t[2] PCA scores plot for lipid extracts ( $R^2X=0.95$ ,  $Q^2=0.92$ ) of three body compartments of *R. pulmo*. b) t[1]/t[2] PCA scores plot for aqueous extracts ( $R^2X=0.73$ ,  $Q^2=0.53$ ) of three body compartments of *R. pulmo*. Red circle, female gonads; blue square, oral arms; green triangle, umbrella.
